# Supplementary material for: Evaluation of dynamic recurrence risk for locally advanced gastric cancer in the clinical setting of adjuvant chemotherapy: a real-world study with IPTW-based conditional recurrence analysis
Source: Springer Nature journal article supplement (doi:10.1186/s12885-023-11143-3), 2023-10-12
Supplement: MOESM2 [file 26158274]

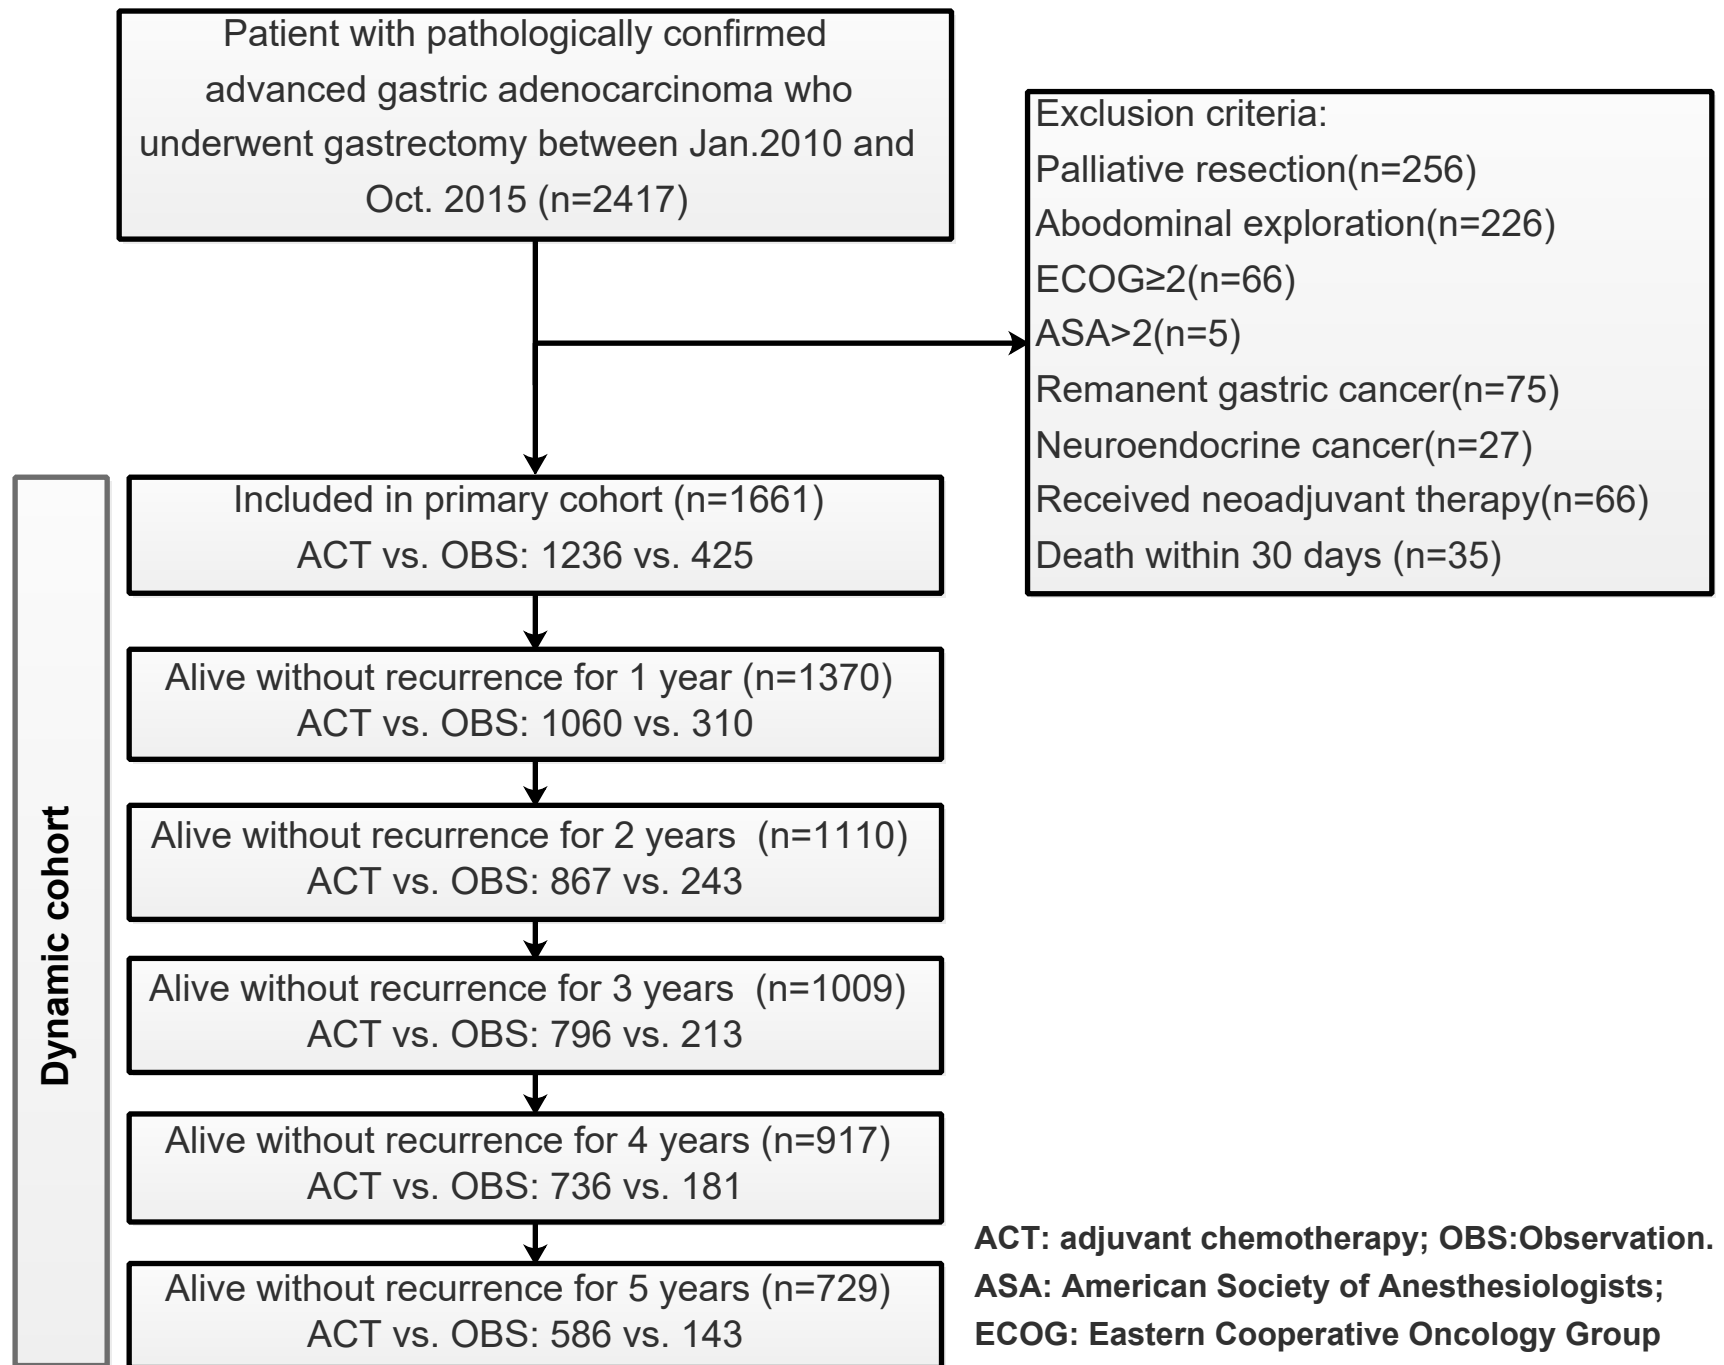

**S-Fig 2 Flow chart**
